# Supplementary material
Source: PubMed Central journal article supplement (PMC2600716)
Supplement: NIHMS61000-supplement-si20051129_083.pdf [file NIHMS61000-supplement-si20051129_083.pdf]

# Supplementary Information

Valentina Tozzini

*NEST - Scuola Normale Superiore, Piazza dei Cavalieri, 7 I-56126 Pisa, Italy*

Walter Rocchia

*Scuola Normale Superiore, Piazza dei Cavalieri, 7 I-56126 Pisa, Italy*

J. Andrew McCammon

*Department of Chemistry and Biochemistry, Center for Theoretical Biological Physics,*

*Howard Hughes Medical Institute, Department of Pharmacology*

*University of California at San Diego, La Jolla, California 92093, USA*

November 29, 2005

## 1 Derivation of the exact formula for $\alpha(\phi, \psi)$

The general formula for  $\alpha(\phi, \psi)$  depends on four variables, namely  $(\phi_i, \phi_{i+1}, \psi_i, \psi_{i+1})$ . The expression for  $\tan(\alpha)$  is a rational function of fourth order trigonometric polynomials in the mentioned variables. Each coefficient is, in turn, a polynomial in  $\sin(\gamma_1)$ ,  $\cos(\gamma_1)$ ,  $\sin(\gamma_2)$ ,  $\cos(\gamma_2)$ ,  $\sin(\tau)$  and  $\cos(\tau)$ . The whole exact, symbolic, expression contains hundreds of terms, and is definitely not manageable. However, by substituting the numerical values of the parameters namely  $\gamma_1 = 20.7$  deg,  $\gamma_2 = 14.7$  deg and  $\tau = 111$  deg, one can obtain a numerical expression (that we called “actual”) that is implementable in a computer code.

In the approximation  $\phi_i = \phi_{i+1}$  and  $\psi_i = \psi_{i+1}$  a manageable expression can be obtained at the second order in  $\gamma_1$ ,  $\gamma_2$  and  $\tau - \pi/2$ :

$$\alpha = \phi + \psi + \pi + \gamma_1 \sin(\psi) + \gamma_2 \sin(\phi) + \frac{1}{4}\gamma_1^2 \sin(2\psi) + \frac{1}{4}\gamma_2^2 \sin(2\phi) + \gamma_1\gamma_2 \sin(\phi + \psi) - \gamma_1(\tau - \pi/2) \sin(\psi) - \gamma_2(\tau - \pi/2) \sin(\phi)$$

Careful attention needs to be paid to keep the value of alpha in the  $[-\pi; \pi]$  interval. We observe that  $\tau - \pi/2$  appears only in the second order mixed terms, coupled with  $\gamma_1$  and  $\gamma_2$ . In its linear approximation, this expression returns eqn. (2) (see main text), where the dependence on  $\tau$  is absent.

In fig. 1, we compare the performance of the second order formula and the first order formula plotting the approximate values of  $\alpha$  versus the “actual” ones. As can be seen from the graphs, the second order formula is an excellent approximation of the desired value for  $\alpha$ , (relative error of  $\sim 1.4\%$ , on a suitably populated configurational ensemble). However, the first order formula can also be a good approximation, if the values of the parameters are “optimized” to reproduce the true values. Using the optimized values of the parameters, we obtain, on the same ensemble, a relative error of  $\sim 3.7\%$ .

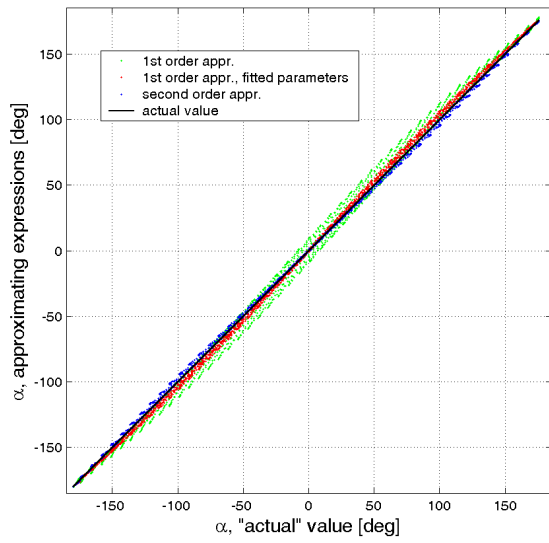

Figure 1: Approximate values of  $\alpha$  versus the exact ones, evaluated on a set of  $\phi, \psi$  pairs evenly spaced in the  $\phi, \psi$  plane. Black line: explicit numeric formula, used as reference. Blue line: second order formula, using the actual values of the parameters:  $\gamma_1 = 20.7$  deg,  $\gamma_2 = 14.7$  deg,  $\tau = 111$  deg. Green line: first order formula using the actual values of the parameters. Red line: first order formula, using optimized values of the parameters,  $\gamma_1 = 15$  deg,  $\gamma_2 = 20$  deg
